# Supplementary material for: Modulating carrier transfer ability—linker effect on thieno[3,4-c]pyrrole-4,6-dione based conjugated polymers
Source: Royal Society of Chemistry journal article supplement (doi:10.1039/c5ra08723f), 2015-01-01
Supplement: c5ra08723f1.pdf [file c5ra08723f1.pdf]

## Supplementary Information

### Modulating Carrier Transfer Ability—Linker Effect on Thieno[3,4-c]pyrrole-4,6-dione Based Conjugated Polymers.

Wanmei Qing, Zitong Liu, Sifeng Yang, Luxi Tan,\* Yang Yang, Daijun Zhang and

Jing Li\*

#### Contents

|                                                                                                                                                    |         |
|----------------------------------------------------------------------------------------------------------------------------------------------------|---------|
| 1. Synthesis of compounds <b>3</b> , <b>4</b> , <b>6</b> , <b>7</b> .....                                                                          | S2-S5   |
| 2. TGA analysis of polymers <b>Q1</b> , <b>Q2</b> and <b>Q3</b> .....                                                                              | S6      |
| 3. Theoretical calculations for <b>Q1</b> , <b>Q2</b> and <b>Q3</b> .....                                                                          | S6-S15  |
| 4. AFM images of the films of polymer <b>Q3</b> .....                                                                                              | S15     |
| 5. XRD of the films of polymer <b>Q1</b> , <b>Q2</b> and <b>Q3</b> .....                                                                           | S16     |
| 6. <sup>1</sup> HNMR & <sup>13</sup> CNMR spectra of compounds <b>3</b> , <b>4</b> , <b>6</b> , <b>7</b> , <b>Q1</b> , <b>Q2</b> , <b>Q3</b> ..... | S17-S19 |
| 7. References.....                                                                                                                                 | S20     |

1. *Synthesis of compounds 3,4,6 and 7*

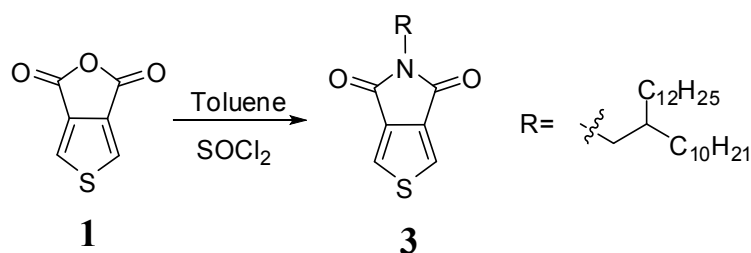

**Synthesis of compound 3<sup>1</sup>:** To the solution of compound 2 (16.4 g, 0.0465 mol) in toluene (40 mL), compound 1 (4.77 g, 0.031 mol) was added, and then the mixture was refluxed over 24h. After removal of the toluene, prepared SOCl<sub>2</sub> (35 mL) was added, the solution then was warmed 85°C and refluxed 24h. The reaction mixture was extracted with ethyl acetate three times, and dried over anhydrous Na<sub>2</sub>SO<sub>4</sub>. After the solvent had been removed, the residue was passed through a silica gel column using CH<sub>2</sub>Cl<sub>2</sub>/hexane (1:3) as an eluent. Then solvent was removed under reduced pressure, Recrystallization of the crude product from hexane provided a pale yellow solid. Yield: 4.2g (27.7%). <sup>1</sup>H NMR (400MHz, CDCl<sub>3</sub>, ppm): δ = 7.80 (s, 2H), 3.51 (d, *J* = 7.2 Hz, 2H), 1.85 (m, 1H), 1.24 (m, 40H), 0.89-0.87 (t, *J* = 7.0 Hz, 6H). <sup>13</sup>C NMR (400 MHz, CDCl<sub>3</sub>, ppm): δ 162.91, 136.69, 125.33, 77.21, 77.00, 76.79, 42.79, 36.90, 31.91, 31.50, 29.96, 29.67, 29.62, 29.59, 29.35, 29.32, 26.28, 22.67, 14.08. Elemental analysis: Calcd. For [C<sub>30</sub>H<sub>51</sub>NO<sub>2</sub>S]: C 73.57, H 10.50, N 2.86, S 6.55. Found: C 73.55, H 10.48, N 2.83, S 6.52; MS (MALDI-TOF): 489.36 (M<sup>+</sup>).

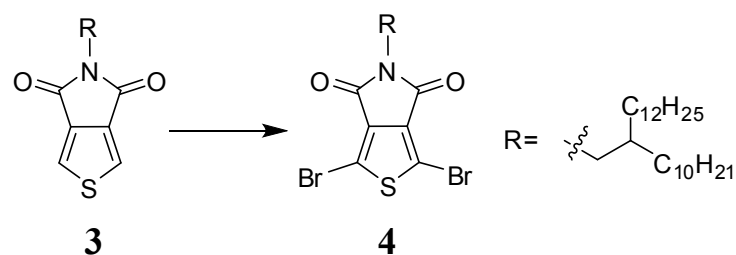

**Synthesis of compound 4<sup>1</sup>:** Concentrated sulfuric acid (12 mL) and trifluoroacetic acid (40 mL) were added to a flask of compound **3** (4.2 g, 8.48 mmol), then N-bromobutanamide (NBS 4.23 g, 0.024 mol) was added in three portions, the reaction mixture was stirred at 55°C and kept in the dark for 12h. The reaction mixture was cooled to room temperature, poured into 200mL ice water, adjusted pH using NaHCO<sub>3</sub>, extracted with CH<sub>2</sub>Cl<sub>2</sub> in several times, washed with brine, combined the organic phase, dried over anhydrous Na<sub>2</sub>SO<sub>4</sub>, then removed the solvent under vacuum pressure, the crude product was purified through column chromatography using CH<sub>2</sub>Cl<sub>2</sub>/hexane (1:3) as an eluent, After removal solvent, afforded the product as yellow solid. Yield: 5.0g (90.1%).<sup>1</sup>H NMR (400MHz, CDCl<sub>3</sub>, ppm): δ=3.48 (d, *J* = 7.2 Hz, 2H), 1.81 (m, 1H), 1.36-1.20 (m, 40H), 0.89-0.87(t, *J* = 7.0 Hz, 6H). <sup>13</sup>C NMR (400 MHz, CDCl<sub>3</sub>, ppm): δ 160.62, 134.78, 112.86, 77.21, 77.00, 76.79, 43.14, 31.92, 31.51, 29.90, 29.68, 29.65, 29.62, 29.59, 29.35, 26.31, 22.68, 14.09. Elemental analysis: Calcd. For [C<sub>30</sub>H<sub>49</sub>Br<sub>2</sub>NO<sub>2</sub>S]: C 55.64, H 7.63, N 2.16, S 4.95. Found: C 55.62, H 7.62, N 2.14, S 4.93; MS (MALDI-TOF): 647.18 (M<sup>+</sup>).

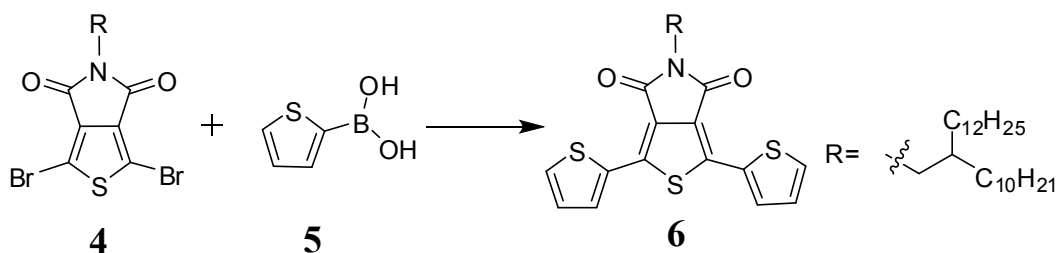

Compound **6** and **7** were synthesized via reported method with only N-alkyl chain differences.<sup>2</sup> The H-NMR, MS and elementary analysis were carried out and the products were used in next reactions without further purifications.

**Synthesis of compound 6:** compound **4** (1.5 g, 2.32 mmol) and compound **5** (0.652 g, 5.1 mmol) were dissolved in a mixture of THF (40 mL) and H<sub>2</sub>O (3 mL), NaHCO<sub>3</sub> (5.85 g, 0.0696 mol) was used as base and tetrakis(triphenylphosphine)palladium (0.134 g, 5% mol) was used as catalyst, the reaction mixture was refluxed at 70°C and kept in the dark overnight. The reaction mixture was diluted with H<sub>2</sub>O, then extracted with CH<sub>2</sub>Cl<sub>2</sub> two times, combined the organic phase, dried over anhydrous Na<sub>2</sub>SO<sub>4</sub>, filtered the product solution, then removed the solvent under reduced pressure, the crude product was purified by column chromatography using CH<sub>2</sub>Cl<sub>2</sub>/hexane (1:2) as an eluent afford 1.024 g of the product as a sodium orange solid. (Yield = 80%).<sup>1</sup>H NMR (400MHz, CDCl<sub>3</sub>, ppm):  $\delta$  = 8.026 (d,  $J$  = 3.9 Hz, 2H), 7.428 (d,  $J$  = 3.8 Hz, 2H), 7.125-7.108 (t,  $J$  = 4.2 Hz, 2H), 3.552(d,  $J$  = 7.2 Hz, 2H), 1.889 (m, 1H), 1.364-1.232 (m, 40H), 0.887-0.853 (m, 6H). Elemental analysis: Calcd. For [C<sub>38</sub>H<sub>55</sub>NO<sub>2</sub>S<sub>3</sub>]: C 69.78, H 8.48, N 2.14, S 14.71. Found: C 69.72, H 8.46, N 2.12, S 14.74; MS (MALDI-TOF): 653.34 (M<sup>+</sup>).

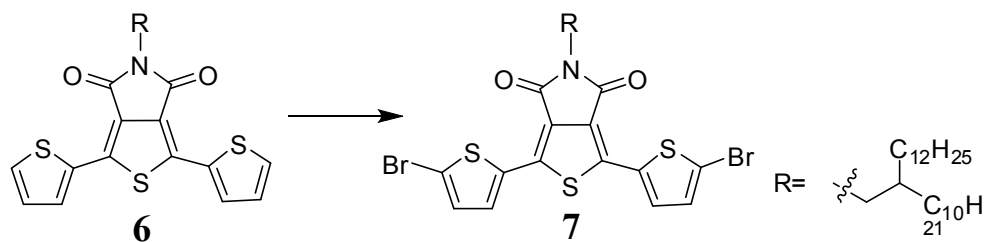

**Synthesis of compound 7:** compound **6** (0.90 g, 1.38 mmol) was dissolved in a mixture of AcOH(25 mL) and CHCl<sub>3</sub> (25 mL), the mixture solution was cooled to 0°C and kept in the dark, then N-bromobutanamide(440 mg, 2.47 mmol) was added in several times, the solution was stirred about 3h, cooling bath was removed, the crude product then was poured into ice water and adjusted PH to neutral with NaHCO<sub>3</sub>, extracted with CH<sub>2</sub>Cl<sub>2</sub>, washed organic phase with brine then combined the organic phase, dried over anhydrous Na<sub>2</sub>SO<sub>4</sub>, the solvent was removed under reduced pressure, the crude product was purified by a silica gel column using CH<sub>2</sub>Cl<sub>2</sub>/hexane(1:3) as an eluent, thus afforded the product as orange solid. Yield: 1.045 g, (93.2%). <sup>1</sup>H NMR (400MHz, CDCl<sub>3</sub>, ppm): δ = 7.601 (d, *J* = 4.0 Hz 2H), 7.006 (d, *J* = 3.9 Hz, 2H), 3.475 (d, *J* = 7.2 Hz, 2H), 1.838 (m, 1H), 1.350-1.230 (m, 40H), 0.880-0.853 (m, 6H). Elemental analysis: Calcd. For [C<sub>38</sub>H<sub>53</sub>Br<sub>2</sub>NO<sub>2</sub>S<sub>3</sub>]: C 56.22, H 6.58, N 1.73, S 11.85. Found: C 56.18, H 6.56, N 1.71, S 11.81; MS (MALDI-TOF): 811.16 (M<sup>+</sup>).

## 2. TGA analysis of Q1, Q2 and Q3

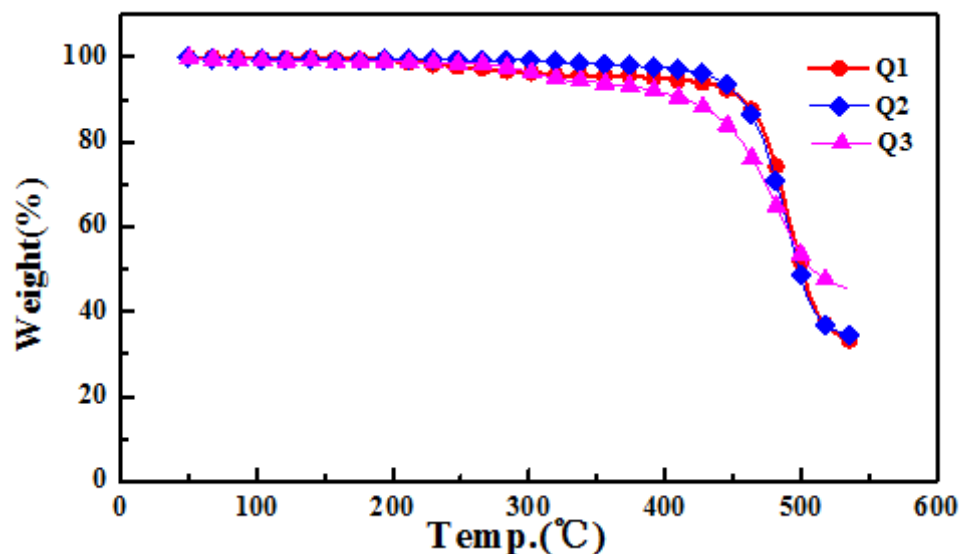

Figure S1. TGA analysis of polymer **Q1**, **Q2** and **Q3**.

## 3. Theoretical calculations for Q1, Q2 and Q3

Geometries optimization and frequency analysis were performed at the level of B3LYP /6-31G\* by using Gaussian09 (revision A.02)<sup>3</sup>. The coordinates and energies at the optimized geometries for 4 repeated units of **Q1**, **Q2** and **Q3** are listed below and there were no any imaginary frequencies. Then the molecular orbitals were analyzed, the energy gaps between HOMO and LUMO were obtained.

Q1:

| Center Number | Atomic Number | Atomic Type | Coordinates (Angstroms) |           |           |
|---------------|---------------|-------------|-------------------------|-----------|-----------|
|               |               |             | X                       | Y         | Z         |
| 1             | 6             | 0           | -6.524609               | -2.010011 | 0.000211  |
| 2             | 6             | 0           | -5.103592               | -1.956089 | -0.000994 |
| 3             | 6             | 0           | -6.936421               | -3.430089 | 0.004103  |
| 4             | 7             | 0           | -5.732097               | -4.158588 | 0.005097  |
| 5             | 6             | 0           | -4.588689               | -3.342708 | 0.002121  |
| 6             | 6             | 0           | -4.566256               | -0.686547 | -0.004566 |
| 7             | 16            | 0           | -5.907517               | 0.475802  | -0.006296 |
| 8             | 6             | 0           | -7.156896               | -0.784491 | -0.002303 |
| 9             | 8             | 0           | -3.445698               | -3.766581 | 0.002294  |
| 10            | 8             | 0           | -8.048190               | -3.930306 | 0.006124  |
| 11            | 6             | 0           | -5.669647               | -5.608751 | 0.008720  |

|    |    |   |            |           |           |
|----|----|---|------------|-----------|-----------|
| 12 | 6  | 0 | -8.542537  | -0.400375 | -0.002183 |
| 13 | 6  | 0 | -3.213271  | -0.199351 | -0.006798 |
| 14 | 6  | 0 | -9.044540  | 0.894149  | -0.004797 |
| 15 | 6  | 0 | -10.448512 | 0.962447  | -0.003855 |
| 16 | 6  | 0 | -11.057245 | -0.283029 | -0.000505 |
| 17 | 16 | 0 | -9.861786  | -1.563720 | 0.001482  |
| 18 | 16 | 0 | -1.811364  | -1.261235 | -0.003686 |
| 19 | 6  | 0 | -0.714603  | 0.105266  | -0.008966 |
| 20 | 6  | 0 | -1.414542  | 1.301828  | -0.012558 |
| 21 | 6  | 0 | -2.809546  | 1.129061  | -0.011328 |
| 22 | 6  | 0 | 5.106206   | 1.961295  | -0.001384 |
| 23 | 6  | 0 | 6.527352   | 2.011875  | -0.000309 |
| 24 | 6  | 0 | 4.591999   | 3.347822  | 0.001780  |
| 25 | 7  | 0 | 5.739820   | 4.162295  | 0.004488  |
| 26 | 6  | 0 | 6.939855   | 3.432078  | 0.003511  |
| 27 | 6  | 0 | 7.156472   | 0.785166  | -0.002930 |
| 28 | 16 | 0 | 5.904376   | -0.472473 | -0.006777 |
| 29 | 6  | 0 | 4.565618   | 0.692713  | -0.004955 |
| 30 | 8  | 0 | 8.049029   | 3.938047  | 0.005536  |
| 31 | 8  | 0 | 3.446823   | 3.765721  | 0.002170  |
| 32 | 6  | 0 | 5.696082   | 5.613178  | 0.008394  |
| 33 | 6  | 0 | 3.212058   | 0.207106  | -0.007168 |
| 34 | 6  | 0 | 8.541627   | 0.399341  | -0.002947 |
| 35 | 6  | 0 | 2.807807   | -1.121242 | -0.012049 |
| 36 | 6  | 0 | 1.412865   | -1.293761 | -0.013140 |
| 37 | 6  | 0 | 0.713185   | -0.097026 | -0.009089 |
| 38 | 16 | 0 | 1.810208   | 1.269163  | -0.003556 |
| 39 | 16 | 0 | 9.861114   | 1.562363  | 0.001052  |
| 40 | 6  | 0 | 11.056163  | 0.281161  | -0.001271 |
| 41 | 6  | 0 | 10.446992  | -0.964073 | -0.004981 |
| 42 | 6  | 0 | 9.042953   | -0.895339 | -0.005917 |
| 43 | 6  | 0 | 16.994917  | -1.144277 | -0.001815 |
| 44 | 6  | 0 | 18.417325  | -1.092232 | 0.000305  |
| 45 | 6  | 0 | 16.580810  | -2.563466 | -0.008669 |
| 46 | 7  | 0 | 17.783446  | -3.293897 | -0.010423 |
| 47 | 6  | 0 | 18.929441  | -2.480553 | -0.005216 |
| 48 | 6  | 0 | 18.955867  | 0.174782  | 0.006462  |
| 49 | 16 | 0 | 17.617728  | 1.338672  | 0.009659  |
| 50 | 6  | 0 | 16.365498  | 0.081634  | 0.002580  |
| 51 | 8  | 0 | 20.070541  | -2.907750 | -0.005498 |
| 52 | 8  | 0 | 15.467834  | -3.061467 | -0.012155 |
| 53 | 6  | 0 | 17.843452  | -4.744120 | -0.017238 |
| 54 | 6  | 0 | 14.979629  | 0.468603  | 0.002372  |
| 55 | 6  | 0 | 20.313564  | 0.663366  | 0.010465  |

|    |    |   |            |           |           |
|----|----|---|------------|-----------|-----------|
| 56 | 6  | 0 | 14.479488  | 1.763493  | 0.006225  |
| 57 | 6  | 0 | 13.075185  | 1.833498  | 0.005306  |
| 58 | 6  | 0 | 12.465235  | 0.588952  | 0.000739  |
| 59 | 16 | 0 | 13.659548  | -0.693082 | -0.002671 |
| 60 | 16 | 0 | 21.718175  | -0.396602 | 0.007336  |
| 61 | 6  | 0 | 22.788832  | 0.959123  | 0.015026  |
| 62 | 6  | 0 | 22.121701  | 2.157066  | 0.019760  |
| 63 | 6  | 0 | 20.715794  | 1.989138  | 0.017177  |
| 64 | 6  | 0 | -18.418625 | 1.088677  | 0.000175  |
| 65 | 6  | 0 | -16.996240 | 1.140985  | -0.001645 |
| 66 | 6  | 0 | -18.930990 | 2.476911  | -0.005290 |
| 67 | 7  | 0 | -17.785130 | 3.290470  | -0.010130 |
| 68 | 6  | 0 | -16.582385 | 2.560267  | -0.008251 |
| 69 | 6  | 0 | -16.366596 | -0.084799 | 0.002755  |
| 70 | 16 | 0 | -17.618558 | -1.342077 | 0.009445  |
| 71 | 6  | 0 | -18.956927 | -0.178451 | 0.006093  |
| 72 | 8  | 0 | -15.469476 | 3.058420  | -0.011539 |
| 73 | 8  | 0 | -20.072157 | 2.903902  | -0.005835 |
| 74 | 6  | 0 | -17.845412 | 4.740690  | -0.016732 |
| 75 | 6  | 0 | -20.314525 | -0.667289 | 0.009744  |
| 76 | 6  | 0 | -14.980624 | -0.471462 | 0.002777  |
| 77 | 6  | 0 | -20.716511 | -1.993140 | 0.016256  |
| 78 | 6  | 0 | -22.122383 | -2.161323 | 0.018502  |
| 79 | 6  | 0 | -22.789727 | -0.963495 | 0.013711  |
| 80 | 16 | 0 | -21.719329 | 0.392421  | 0.006377  |
| 81 | 16 | 0 | -13.660839 | 0.690519  | -0.002225 |
| 82 | 6  | 0 | -12.466221 | -0.591223 | 0.001411  |
| 83 | 6  | 0 | -13.075880 | -1.835911 | 0.006011  |
| 84 | 6  | 0 | -14.480199 | -1.766246 | 0.006775  |
| 85 | 1  | 0 | -5.143714  | -5.965901 | 0.898077  |
| 86 | 1  | 0 | -5.141564  | -5.970045 | -0.877656 |
| 87 | 1  | 0 | -6.694580  | -5.980019 | 0.008454  |
| 88 | 1  | 0 | -8.408424  | 1.772151  | -0.007287 |
| 89 | 1  | 0 | -11.002472 | 1.894159  | -0.005481 |
| 90 | 1  | 0 | -0.931726  | 2.272326  | -0.016554 |
| 91 | 1  | 0 | -3.509702  | 1.956862  | -0.013995 |
| 92 | 1  | 0 | 6.192849   | 6.007593  | 0.898769  |
| 93 | 1  | 0 | 4.646776   | 5.908628  | 0.006205  |
| 94 | 1  | 0 | 6.198063   | 6.012299  | -0.876911 |
| 95 | 1  | 0 | 3.507678   | -1.949270 | -0.015083 |
| 96 | 1  | 0 | 0.929877   | -2.264170 | -0.017365 |
| 97 | 1  | 0 | 11.000667  | -1.895959 | -0.006884 |
| 98 | 1  | 0 | 8.406440   | -1.773064 | -0.008672 |
| 99 | 1  | 0 | 16.817972  | -5.113832 | -0.011753 |



|     |   |   |            |           |           |
|-----|---|---|------------|-----------|-----------|
| 100 | 1 | 0 | 18.376436  | -5.107581 | 0.865265  |
| 101 | 1 | 0 | 18.363729  | -5.100629 | -0.910216 |
| 102 | 1 | 0 | 15.116814  | 2.640588  | 0.009613  |
| 103 | 1 | 0 | 12.522397  | 2.765949  | 0.007956  |
| 104 | 1 | 0 | 23.857538  | 0.792720  | 0.015639  |
| 105 | 1 | 0 | 22.615189  | 3.121619  | 0.024919  |
| 106 | 1 | 0 | 20.015929  | 2.817382  | 0.020198  |
| 107 | 1 | 0 | -16.819986 | 5.110585  | -0.014714 |
| 108 | 1 | 0 | -18.368850 | 5.096911  | -0.907950 |
| 109 | 1 | 0 | -18.375392 | 5.104241  | 0.867564  |
| 110 | 1 | 0 | -20.016498 | -2.821258 | 0.019373  |
| 111 | 1 | 0 | -22.615703 | -3.125963 | 0.023468  |
| 112 | 1 | 0 | -23.858464 | -0.797288 | 0.014086  |
| 113 | 1 | 0 | -12.522884 | -2.768236 | 0.008829  |
| 114 | 1 | 0 | -15.117332 | -2.643478 | 0.010189  |

-----

Nuclear repulsive energy:13840.6134360380 Hartrees

Q2:

| Center<br>Number | Atomic<br>Number | Atomic<br>Type | Coordinates (Angstroms) |           |           |
|------------------|------------------|----------------|-------------------------|-----------|-----------|
|                  |                  |                | X                       | Y         | Z         |
| 1                | 6                | 0              | -20.091832              | 0.867291  | 0.000799  |
| 2                | 6                | 0              | -21.515243              | 0.851195  | 0.000996  |
| 3                | 6                | 0              | -19.645705              | 2.277461  | 0.001232  |
| 4                | 7                | 0              | -20.828299              | 3.036120  | 0.001677  |
| 5                | 6                | 0              | -21.995920              | 2.250311  | 0.001562  |
| 6                | 6                | 0              | -22.086697              | -0.401697 | 0.000657  |
| 7                | 16               | 0              | -20.779202              | -1.599325 | 0.000082  |
| 8                | 6                | 0              | -19.494241              | -0.374825 | 0.000317  |
| 9                | 8                | 0              | -23.130047              | 2.696199  | 0.001841  |
| 10               | 8                | 0              | -18.525625              | 2.758647  | 0.001197  |
| 11               | 6                | 0              | -20.836824              | 4.487471  | 0.002283  |
| 12               | 6                | 0              | -18.119758              | -0.798023 | 0.000017  |
| 13               | 6                | 0              | -23.456209              | -0.856325 | 0.000702  |
| 14               | 6                | 0              | -17.654518              | -2.106614 | -0.000402 |
| 15               | 6                | 0              | -16.252980              | -2.209927 | -0.000610 |
| 16               | 6                | 0              | -15.607449              | -0.981291 | -0.000330 |
| 17               | 16               | 0              | -16.769171              | 0.330873  | 0.000164  |

|    |    |   |            |           |           |
|----|----|---|------------|-----------|-----------|
| 18 | 6  | 0 | -14.184685 | -0.777440 | -0.000411 |
| 19 | 6  | 0 | -13.539122 | 0.417688  | -0.000259 |
| 20 | 16 | 0 | -24.835559 | 0.236562  | 0.001103  |
| 21 | 6  | 0 | -25.938157 | -1.093354 | 0.000946  |
| 22 | 6  | 0 | -25.299626 | -2.306776 | 0.000576  |
| 23 | 6  | 0 | -23.890192 | -2.172181 | 0.000437  |
| 24 | 6  | 0 | 21.515249  | -0.851161 | 0.001090  |
| 25 | 6  | 0 | 20.091838  | -0.867272 | 0.000880  |
| 26 | 6  | 0 | 21.995939  | -2.250273 | 0.001892  |
| 27 | 7  | 0 | 20.828326  | -3.036093 | 0.002102  |
| 28 | 6  | 0 | 19.645726  | -2.277447 | 0.001504  |
| 29 | 6  | 0 | 19.494233  | 0.374837  | 0.000238  |
| 30 | 16 | 0 | 20.779184  | 1.599351  | -0.000159 |
| 31 | 6  | 0 | 22.086689  | 0.401737  | 0.000584  |
| 32 | 8  | 0 | 18.525649  | -2.758641 | 0.001518  |
| 33 | 8  | 0 | 23.130069  | -2.696152 | 0.002264  |
| 34 | 6  | 0 | 20.836871  | -4.487444 | 0.002942  |
| 35 | 6  | 0 | 23.456197  | 0.856378  | 0.000586  |
| 36 | 6  | 0 | 18.119747  | 0.798024  | -0.000119 |
| 37 | 6  | 0 | 23.890167  | 2.172239  | 0.000147  |
| 38 | 6  | 0 | 25.299599  | 2.306848  | 0.000269  |
| 39 | 6  | 0 | 25.938143  | 1.093432  | 0.000799  |
| 40 | 16 | 0 | 24.835558  | -0.236495 | 0.001135  |
| 41 | 16 | 0 | 16.769168  | -0.330880 | 0.000115  |
| 42 | 6  | 0 | 15.607438  | 0.981276  | -0.000505 |
| 43 | 6  | 0 | 16.252960  | 2.209916  | -0.000848 |
| 44 | 6  | 0 | 17.654499  | 2.106613  | -0.000629 |
| 45 | 6  | 0 | 7.626087   | 1.219840  | -0.000696 |
| 46 | 6  | 0 | 6.204057   | 1.200371  | -0.000745 |
| 47 | 6  | 0 | 8.072085   | 2.630040  | -0.000608 |
| 48 | 7  | 0 | 6.885469   | 3.387013  | -0.000591 |
| 49 | 6  | 0 | 5.722524   | 2.599230  | -0.000666 |
| 50 | 6  | 0 | 5.635581   | -0.056358 | -0.000796 |
| 51 | 16 | 0 | 6.948747   | -1.250684 | -0.000811 |
| 52 | 6  | 0 | 8.228954   | -0.021230 | -0.000684 |
| 53 | 8  | 0 | 4.590742   | 3.052062  | -0.000688 |
| 54 | 8  | 0 | 9.194788   | 3.104945  | -0.000551 |
| 55 | 6  | 0 | 6.857832   | 4.838053  | -0.000491 |
| 56 | 6  | 0 | 9.603654   | -0.440538 | -0.000599 |
| 57 | 6  | 0 | 4.272337   | -0.511657 | -0.000826 |
| 58 | 6  | 0 | 10.070633  | -1.749069 | -0.000566 |
| 59 | 6  | 0 | 11.471754  | -1.851237 | -0.000477 |
| 60 | 6  | 0 | 12.116466  | -0.621849 | -0.000481 |
| 61 | 16 | 0 | 10.953986  | 0.689379  | -0.000530 |

|     |    |   |            |           |           |
|-----|----|---|------------|-----------|-----------|
| 62  | 6  | 0 | 13.539117  | -0.417713 | -0.000388 |
| 63  | 6  | 0 | 14.184674  | 0.777417  | -0.000627 |
| 64  | 16 | 0 | 2.893913   | 0.583643  | -0.000786 |
| 65  | 6  | 0 | 1.765169   | -0.756930 | -0.000851 |
| 66  | 6  | 0 | 2.441027   | -1.969478 | -0.000911 |
| 67  | 6  | 0 | 3.839134   | -1.831691 | -0.000903 |
| 68  | 6  | 0 | -6.204052  | -1.200395 | -0.000718 |
| 69  | 6  | 0 | -7.626082  | -1.219869 | -0.000697 |
| 70  | 6  | 0 | -5.722510  | -2.599249 | -0.000835 |
| 71  | 7  | 0 | -6.885454  | -3.387038 | -0.000932 |
| 72  | 6  | 0 | -8.072072  | -2.630073 | -0.000893 |
| 73  | 6  | 0 | -8.228959  | 0.021196  | -0.000517 |
| 74  | 16 | 0 | -6.948754  | 1.250658  | -0.000419 |
| 75  | 6  | 0 | -5.635586  | 0.056340  | -0.000609 |
| 76  | 8  | 0 | -9.194775  | -3.104980 | -0.001040 |
| 77  | 8  | 0 | -4.590729  | -3.052081 | -0.000872 |
| 78  | 6  | 0 | -6.857795  | -4.838078 | -0.001052 |
| 79  | 6  | 0 | -4.272343  | 0.511642  | -0.000601 |
| 80  | 6  | 0 | -9.603660  | 0.440502  | -0.000425 |
| 81  | 6  | 0 | -3.839138  | 1.831674  | -0.000464 |
| 82  | 6  | 0 | -2.441030  | 1.969460  | -0.000494 |
| 83  | 6  | 0 | -1.765173  | 0.756911  | -0.000679 |
| 84  | 16 | 0 | -2.893920  | -0.583660 | -0.000828 |
| 85  | 6  | 0 | -0.337925  | 0.589206  | -0.000704 |
| 86  | 6  | 0 | 0.337920   | -0.589226 | -0.000834 |
| 87  | 16 | 0 | -10.953994 | -0.689412 | -0.000551 |
| 88  | 6  | 0 | -12.116471 | 0.621819  | -0.000312 |
| 89  | 6  | 0 | -11.471756 | 1.851205  | -0.000175 |
| 90  | 6  | 0 | -10.070636 | 1.749034  | -0.000229 |
| 91  | 1  | 0 | -20.330729 | 4.871881  | 0.891828  |
| 92  | 1  | 0 | -20.325005 | 4.872303  | -0.883752 |
| 93  | 1  | 0 | -21.878717 | 4.808120  | -0.000835 |
| 94  | 1  | 0 | -18.315667 | -2.966004 | -0.000548 |
| 95  | 1  | 0 | -15.715211 | -3.151363 | -0.000937 |
| 96  | 1  | 0 | -13.600318 | -1.696500 | -0.000606 |
| 97  | 1  | 0 | -14.123541 | 1.336687  | -0.000066 |
| 98  | 1  | 0 | -27.002614 | -0.901625 | 0.001132  |
| 99  | 1  | 0 | -25.815807 | -3.259406 | 0.000423  |
| 100 | 1  | 0 | -23.210359 | -3.016932 | 0.000168  |
| 101 | 1  | 0 | 21.878766  | -4.808088 | -0.000046 |
| 102 | 1  | 0 | 20.330712  | -4.871716 | 0.892511  |
| 103 | 1  | 0 | 20.325124  | -4.872424 | -0.883070 |
| 104 | 1  | 0 | 23.210325  | 3.016982  | -0.000239 |
| 105 | 1  | 0 | 25.815771  | 3.259483  | -0.000017 |

|     |   |   |            |           |           |
|-----|---|---|------------|-----------|-----------|
| 106 | 1 | 0 | 27.002602  | 0.901714  | 0.001003  |
| 107 | 1 | 0 | 15.715185  | 3.151349  | -0.001243 |
| 108 | 1 | 0 | 18.315643  | 2.966007  | -0.000826 |
| 109 | 1 | 0 | 6.339723   | 5.209904  | 0.887464  |
| 110 | 1 | 0 | 6.339290   | 5.209992  | -0.888152 |
| 111 | 1 | 0 | 7.891414   | 5.184529  | -0.000708 |
| 112 | 1 | 0 | 9.410388   | -2.609150 | -0.000584 |
| 113 | 1 | 0 | 12.010341  | -2.792184 | -0.000403 |
| 114 | 1 | 0 | 14.123539  | -1.336711 | -0.000100 |
| 115 | 1 | 0 | 13.600303  | 1.696474  | -0.000968 |
| 116 | 1 | 0 | 1.926596   | -2.923840 | -0.000966 |
| 117 | 1 | 0 | 4.521304   | -2.674479 | -0.000957 |
| 118 | 1 | 0 | -7.891374  | -5.184553 | -0.002038 |
| 119 | 1 | 0 | -6.338618  | -5.209826 | -0.888417 |
| 120 | 1 | 0 | -6.340312  | -5.210115 | 0.887195  |
| 121 | 1 | 0 | -4.521307  | 2.674463  | -0.000311 |
| 122 | 1 | 0 | -1.926598  | 2.923821  | -0.000357 |
| 123 | 1 | 0 | 0.222949   | 1.522779  | -0.000589 |
| 124 | 1 | 0 | -0.222953  | -1.522799 | -0.000922 |
| 125 | 1 | 0 | -12.010341 | 2.792153  | -0.000023 |
| 126 | 1 | 0 | -9.410390  | 2.609113  | -0.000121 |

Nuclear repulsive energy: 14484.7839564163 Hartrees

### Q3:

| Center<br>Number | Atomic<br>Number | Atomic<br>Type | Coordinates (Angstroms) |           |           |
|------------------|------------------|----------------|-------------------------|-----------|-----------|
|                  |                  |                | X                       | Y         | Z         |
| 1                | 6                | 0              | -20.756585              | 1.054984  | 0.000273  |
| 2                | 6                | 0              | -22.179263              | 1.029093  | 0.000574  |
| 3                | 6                | 0              | -20.318755              | 2.467619  | -0.001229 |
| 4                | 7                | 0              | -21.504872              | 3.219064  | -0.001802 |
| 5                | 6                | 0              | -22.668253              | 2.425644  | -0.000763 |
| 6                | 6                | 0              | -22.740735              | -0.228599 | 0.001952  |
| 7                | 16               | 0              | -21.423775              | -1.415919 | 0.002852  |
| 8                | 6                | 0              | -20.149514              | -0.181262 | 0.001387  |
| 9                | 8                | 0              | -23.804686              | 2.864779  | -0.000987 |
| 10               | 8                | 0              | -19.199874              | 2.951435  | -0.001879 |
| 11               | 6                | 0              | -21.522389              | 4.670598  | -0.003328 |

|    |    |   |            |           |           |
|----|----|---|------------|-----------|-----------|
| 12 | 6  | 0 | -18.768715 | -0.589334 | 0.001491  |
| 13 | 6  | 0 | -24.106680 | -0.693621 | 0.002730  |
| 14 | 6  | 0 | -18.293807 | -1.895637 | 0.002504  |
| 15 | 6  | 0 | -16.892697 | -1.996132 | 0.002362  |
| 16 | 6  | 0 | -16.262513 | -0.758776 | 0.001235  |
| 17 | 16 | 0 | -17.431756 | 0.550821  | 0.000319  |
| 18 | 16 | 0 | -25.493551 | 0.389495  | 0.001643  |
| 19 | 6  | 0 | -26.586513 | -0.948121 | 0.003391  |
| 20 | 6  | 0 | -25.939475 | -2.157123 | 0.004746  |
| 21 | 6  | 0 | -24.531122 | -2.012599 | 0.004371  |
| 22 | 6  | 0 | -14.889575 | -0.489702 | 0.000806  |
| 23 | 6  | 0 | -13.697057 | -0.226197 | 0.000422  |
| 24 | 6  | 0 | 22.183949  | -1.015197 | 0.000882  |
| 25 | 6  | 0 | 20.761419  | -1.048931 | -0.000114 |
| 26 | 6  | 0 | 22.677999  | -2.410272 | -0.001048 |
| 27 | 7  | 0 | 21.521484  | -3.208821 | -0.003219 |
| 28 | 6  | 0 | 20.328708  | -2.462842 | -0.002705 |
| 29 | 6  | 0 | 20.147298  | 0.184252  | 0.001464  |
| 30 | 16 | 0 | 21.414997  | 1.425607  | 0.004286  |
| 31 | 6  | 0 | 22.738259  | 0.245257  | 0.003252  |
| 32 | 8  | 0 | 19.208862  | -2.944420 | -0.004047 |
| 33 | 8  | 0 | 23.813512  | -2.851845 | -0.000822 |
| 34 | 6  | 0 | 21.562433  | -4.659854 | -0.005812 |
| 35 | 6  | 0 | 24.102094  | 0.716357  | 0.004882  |
| 36 | 6  | 0 | 18.764779  | 0.586472  | 0.001197  |
| 37 | 6  | 0 | 24.521523  | 2.036837  | 0.007024  |
| 38 | 6  | 0 | 25.929425  | 2.186438  | 0.008267  |
| 39 | 6  | 0 | 26.580877  | 0.979828  | 0.007071  |
| 40 | 16 | 0 | 25.492754  | -0.361844 | 0.004398  |
| 41 | 16 | 0 | 17.431342  | -0.557871 | -0.000729 |
| 42 | 6  | 0 | 16.257910  | 0.747852  | 0.000309  |
| 43 | 6  | 0 | 16.884109  | 1.987263  | 0.001974  |
| 44 | 6  | 0 | 18.285432  | 1.891244  | 0.002473  |
| 45 | 6  | 0 | 7.819109   | 1.728913  | -0.001898 |
| 46 | 6  | 0 | 6.398233   | 1.696389  | -0.001982 |
| 47 | 6  | 0 | 8.249674   | 3.144203  | -0.001381 |
| 48 | 7  | 0 | 7.059125   | 3.889679  | -0.001210 |
| 49 | 6  | 0 | 5.901362   | 3.089702  | -0.001541 |
| 50 | 6  | 0 | 5.841514   | 0.435041  | -0.002349 |
| 51 | 16 | 0 | 7.165019   | -0.746975 | -0.002638 |
| 52 | 6  | 0 | 8.432709   | 0.494573  | -0.002221 |
| 53 | 8  | 0 | 4.761107   | 3.519809  | -0.001527 |
| 54 | 8  | 0 | 9.365644   | 3.633993  | -0.001176 |
| 55 | 6  | 0 | 7.033738   | 5.341236  | -0.000570 |

|    |    |   |            |           |           |
|----|----|---|------------|-----------|-----------|
| 56 | 6  | 0 | 9.814592   | 0.093767  | -0.002199 |
| 57 | 6  | 0 | 4.479955   | -0.030685 | -0.002466 |
| 58 | 6  | 0 | 10.295851  | -1.210558 | -0.002729 |
| 59 | 6  | 0 | 11.696986  | -1.304520 | -0.002441 |
| 60 | 6  | 0 | 12.321672  | -0.063967 | -0.001671 |
| 61 | 16 | 0 | 11.146802  | 1.240188  | -0.001365 |
| 62 | 16 | 0 | 3.093864   | 1.049758  | -0.002211 |
| 63 | 6  | 0 | 1.983552   | -0.309786 | -0.002438 |
| 64 | 6  | 0 | 2.667502   | -1.518638 | -0.002707 |
| 65 | 6  | 0 | 4.062322   | -1.356890 | -0.002725 |
| 66 | 6  | 0 | 13.693538  | 0.210022  | -0.001077 |
| 67 | 6  | 0 | 14.885708  | 0.475098  | -0.000463 |
| 68 | 6  | 0 | -6.397355  | -1.703643 | -0.000370 |
| 69 | 6  | 0 | -7.818138  | -1.740138 | -0.000111 |
| 70 | 6  | 0 | -5.899139  | -3.096792 | 0.000177  |
| 71 | 7  | 0 | -7.052186  | -3.898778 | 0.000704  |
| 72 | 6  | 0 | -8.247355  | -3.155518 | 0.000625  |
| 73 | 6  | 0 | -8.435420  | -0.507200 | -0.000511 |
| 74 | 16 | 0 | -7.170934  | 0.737565  | -0.001242 |
| 75 | 6  | 0 | -5.844391  | -0.441070 | -0.000957 |
| 76 | 8  | 0 | -9.365579  | -3.640111 | 0.001137  |
| 77 | 8  | 0 | -4.760886  | -3.532219 | 0.000232  |
| 78 | 6  | 0 | -7.007516  | -5.349841 | 0.001407  |
| 79 | 6  | 0 | -4.483605  | 0.026910  | -0.001341 |
| 80 | 6  | 0 | -9.817922  | -0.108531 | -0.000431 |
| 81 | 6  | 0 | -4.067248  | 1.353418  | -0.001798 |
| 82 | 6  | 0 | -2.672465  | 1.516217  | -0.002133 |
| 83 | 6  | 0 | -1.987558  | 0.307935  | -0.001941 |
| 84 | 16 | 0 | -3.096839  | -1.052582 | -0.001314 |
| 85 | 16 | 0 | -11.149654 | -1.255582 | 0.000435  |
| 86 | 6  | 0 | -12.325207 | 0.047822  | -0.000006 |
| 87 | 6  | 0 | -11.701214 | 1.288761  | -0.000787 |
| 88 | 6  | 0 | -10.300134 | 1.195538  | -0.001019 |
| 89 | 6  | 0 | -0.603882  | 0.102274  | -0.002137 |
| 90 | 6  | 0 | 0.600005   | -0.103290 | -0.002291 |
| 91 | 1  | 0 | -22.566227 | 4.984802  | -0.002235 |
| 92 | 1  | 0 | -21.017044 | 5.057207  | -0.892273 |
| 93 | 1  | 0 | -21.014551 | 5.058982  | 0.883403  |
| 94 | 1  | 0 | -18.949787 | -2.758919 | 0.003319  |
| 95 | 1  | 0 | -16.345460 | -2.930506 | 0.003053  |
| 96 | 1  | 0 | -27.652301 | -0.763925 | 0.003340  |
| 97 | 1  | 0 | -26.448999 | -3.113300 | 0.005976  |
| 98 | 1  | 0 | -23.845346 | -2.852544 | 0.005299  |
| 99 | 1  | 0 | 20.532188  | -5.016037 | 0.001419  |

|     |   |   |            |           |           |
|-----|---|---|------------|-----------|-----------|
| 100 | 1 | 0 | 22.077377  | -5.025622 | -0.898104 |
| 101 | 1 | 0 | 22.091193  | -5.027532 | 0.877457  |
| 102 | 1 | 0 | 23.832582  | 2.874200  | 0.007669  |
| 103 | 1 | 0 | 26.435497  | 3.144452  | 0.009967  |
| 104 | 1 | 0 | 27.647331  | 0.799539  | 0.007607  |
| 105 | 1 | 0 | 16.333860  | 2.919861  | 0.002809  |
| 106 | 1 | 0 | 18.938520  | 2.756703  | 0.003731  |
| 107 | 1 | 0 | 5.988278   | 5.649949  | -0.005044 |
| 108 | 1 | 0 | 7.534139   | 5.731089  | 0.889738  |
| 109 | 1 | 0 | 7.542238   | 5.731538  | -0.886018 |
| 110 | 1 | 0 | 9.644057   | -2.077043 | -0.003290 |
| 111 | 1 | 0 | 12.248699  | -2.236219 | -0.002746 |
| 112 | 1 | 0 | 2.161577   | -2.475974 | -0.002875 |
| 113 | 1 | 0 | 4.755420   | -2.190648 | -0.002911 |
| 114 | 1 | 0 | -8.036901  | -5.708536 | 0.004431  |
| 115 | 1 | 0 | -6.482385  | -5.714521 | 0.888092  |
| 116 | 1 | 0 | -6.487366  | -5.715811 | -0.887713 |
| 117 | 1 | 0 | -4.761108  | 2.186554  | -0.001882 |
| 118 | 1 | 0 | -2.167280  | 2.473949  | -0.002497 |
| 119 | 1 | 0 | -12.253454 | 2.220142  | -0.001164 |
| 120 | 1 | 0 | -9.648929  | 2.062454  | -0.001605 |

---

Nuclear repulsive energy:14011.3988700235 Hartrees

#### 4. AFM image of the films of polymer Q3

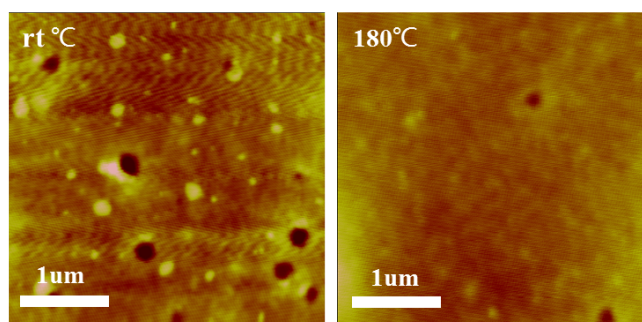

Figure S2. AFM image of the films of polymer Q3

#### 5. XRD of the films of polymer Q1, Q2 and Q3

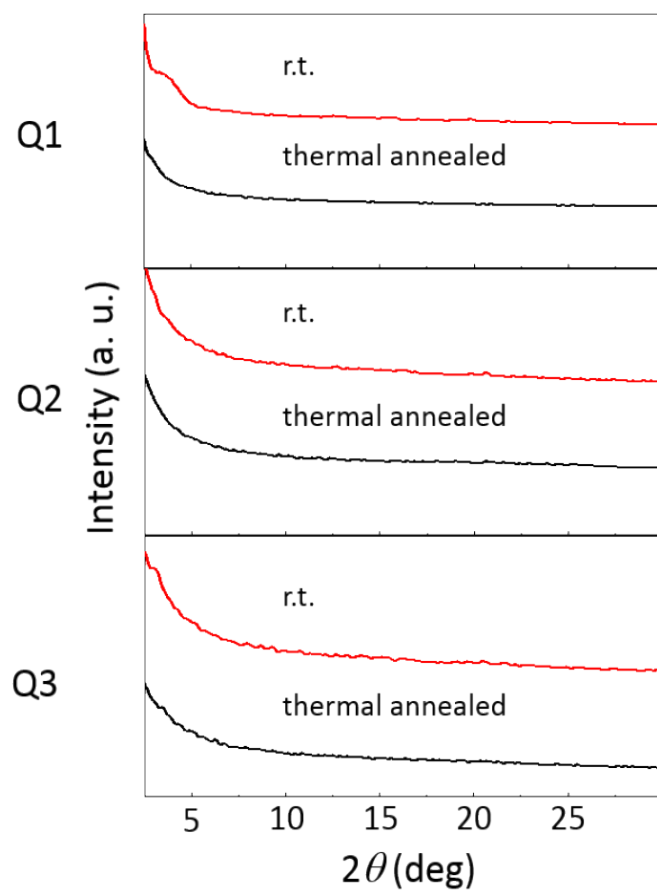

Figure S3. 5. XRD of the films of polymer Q1, Q2 and Q3





## Compound 4

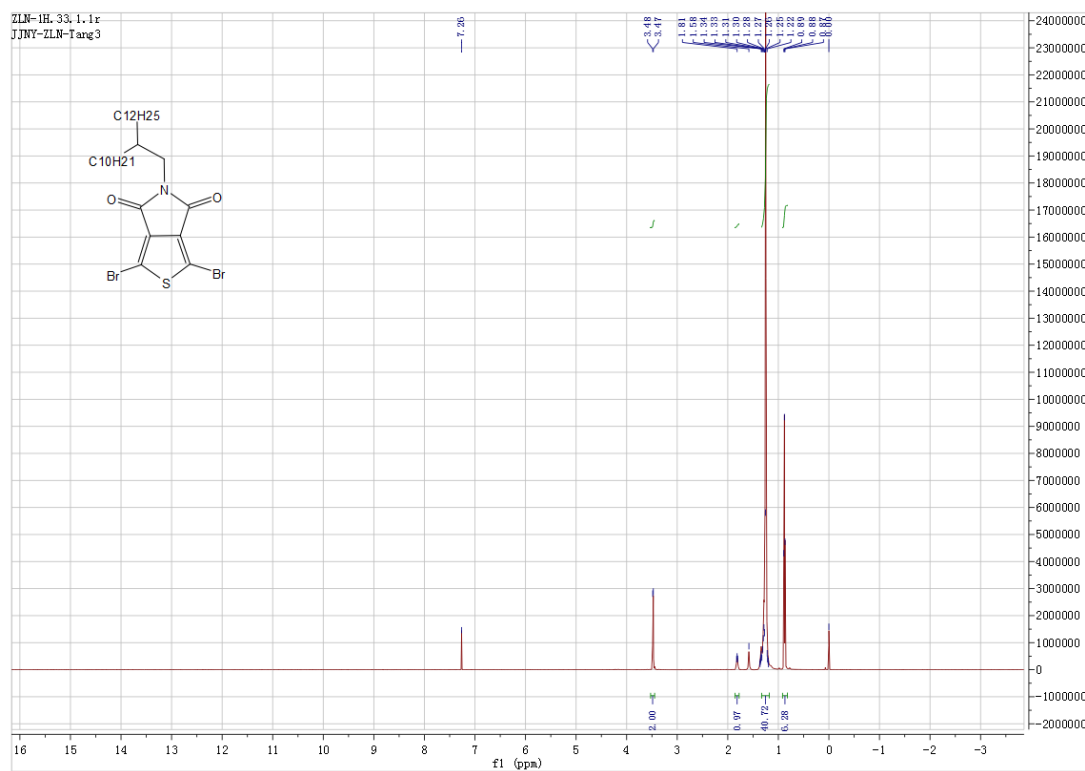

Figure S6.  $^1\text{H}$  NMR spectrum of **4** (400 MHz, r. t., in  $\text{CDCl}_3$ ).

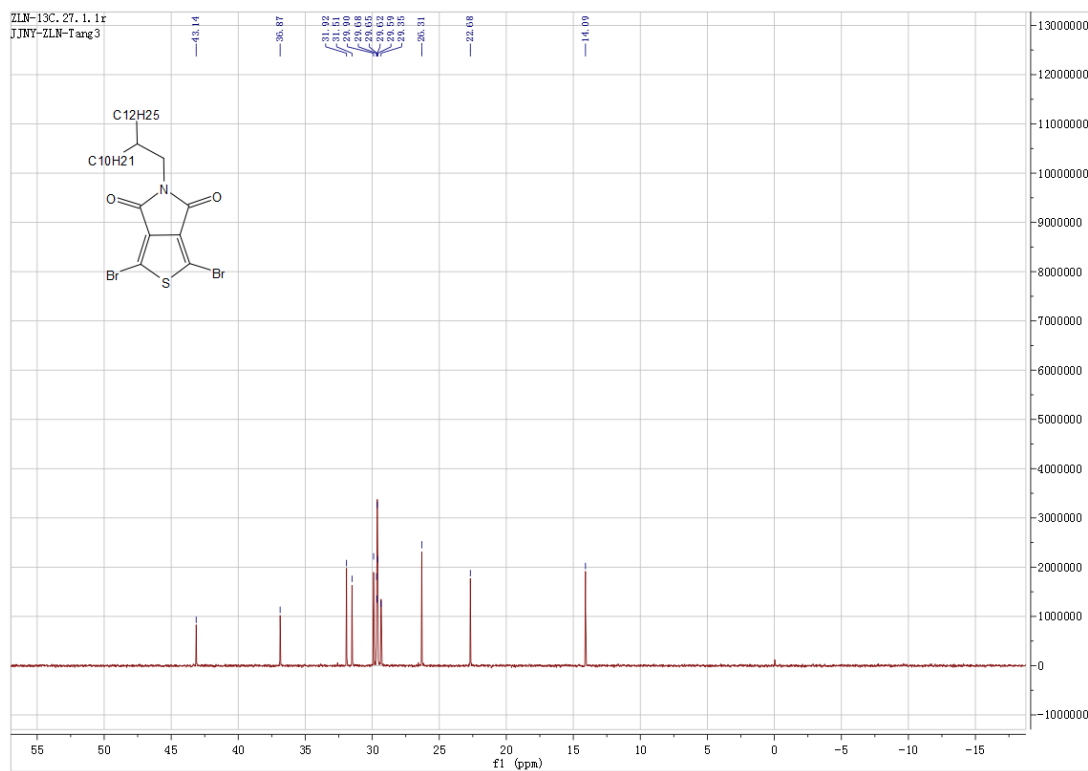

Figure S7.  $^{13}\text{C}$  NMR spectrum of **4** (400 MHz, r. t., in  $\text{CDCl}_3$ ).

### Compound 6

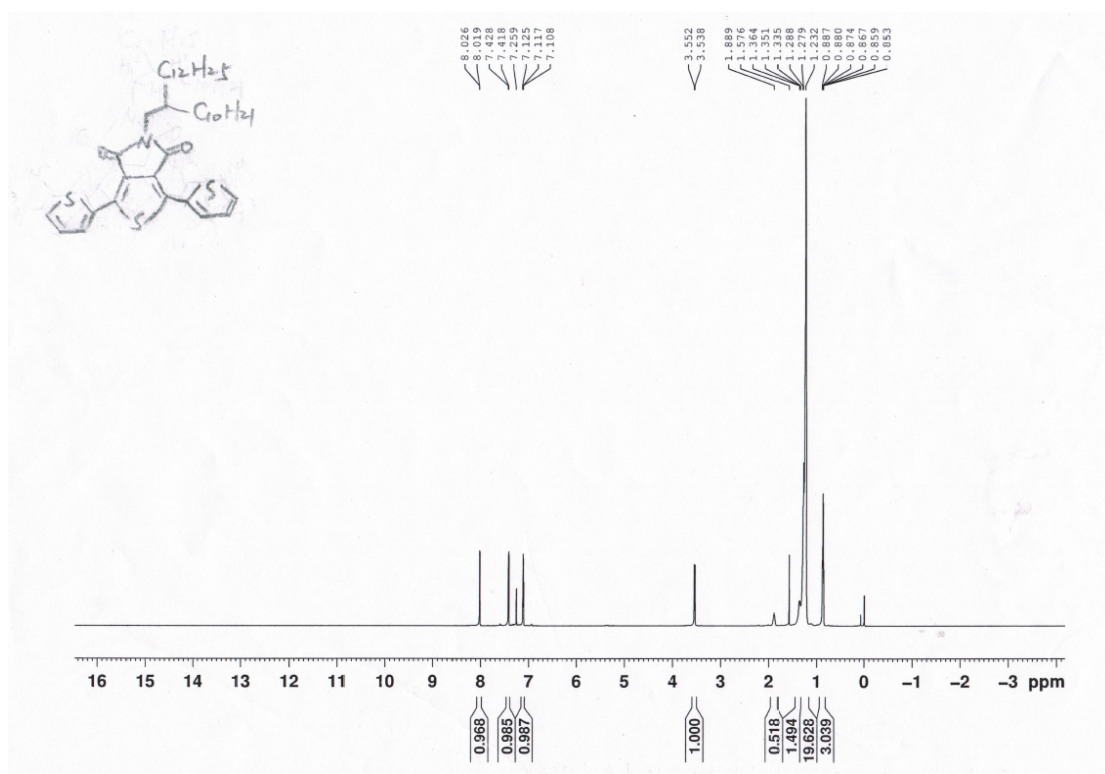

Figure S8. <sup>1</sup>H NMR spectrum of 6 (400 MHz, r. t., in CDCl<sub>3</sub>).

### Compound 7

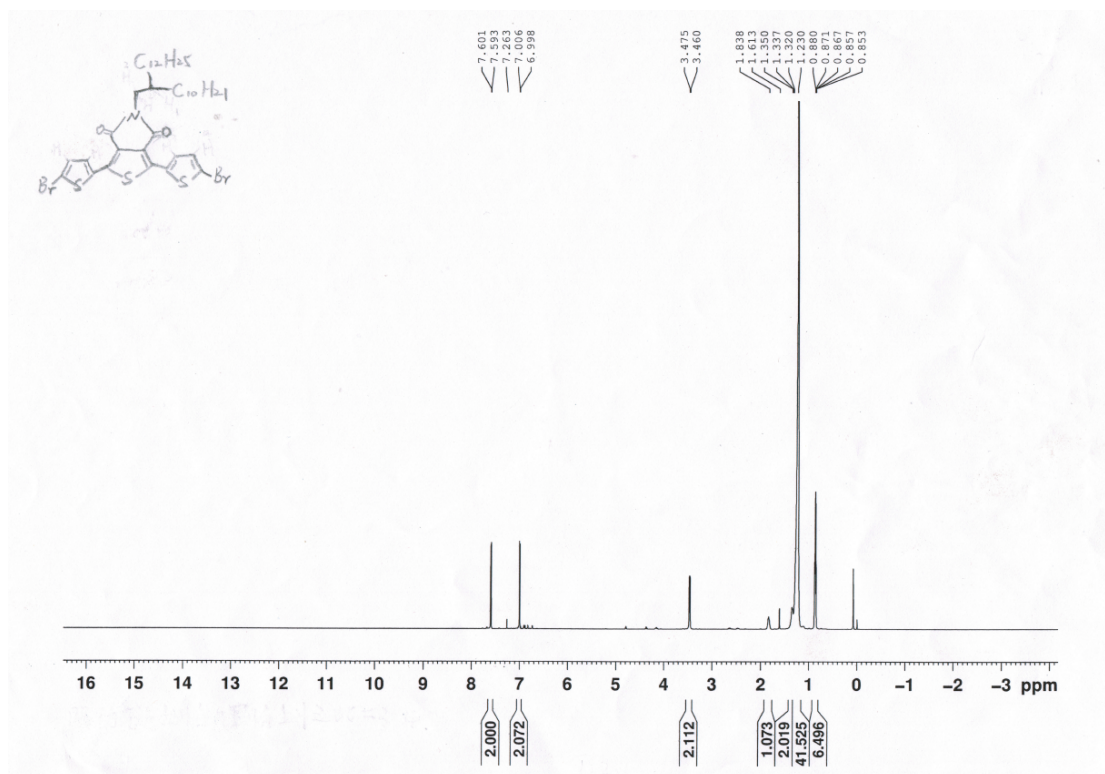

Figure S9. <sup>1</sup>H NMR spectrum of 7 (400 MHz, r. t., in CDCl<sub>3</sub>).

## Polymer Q1

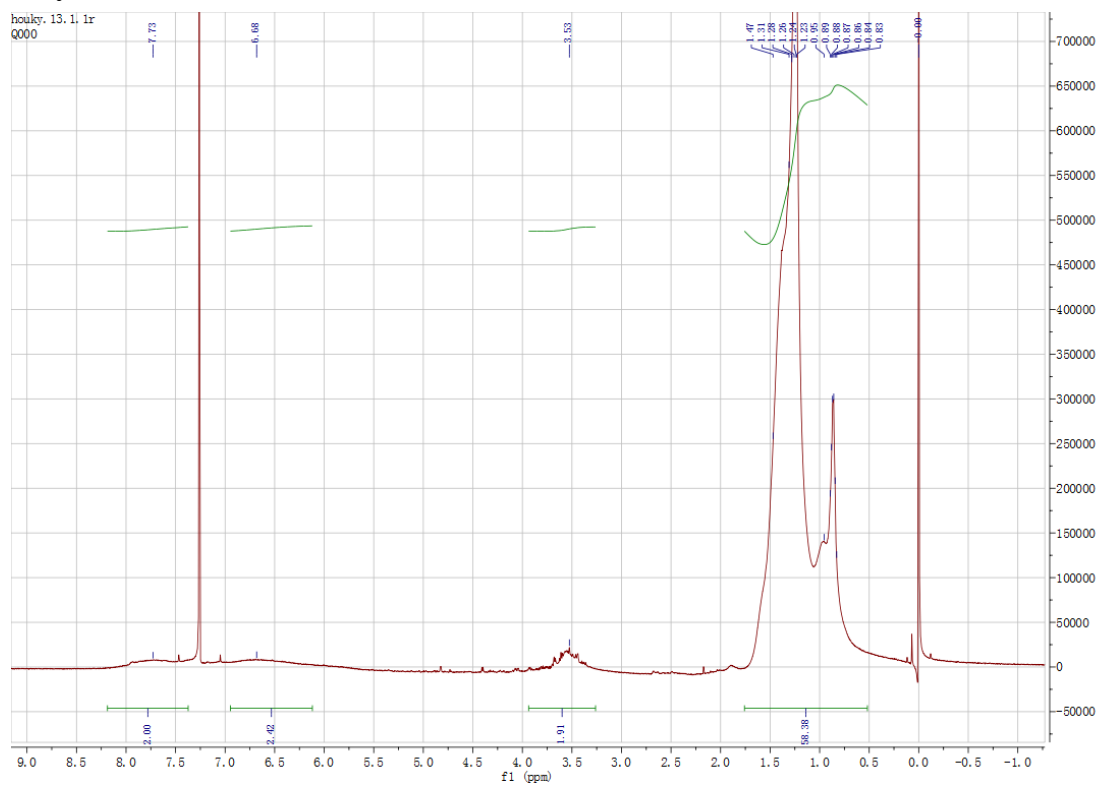

Figure S10.  $^1\text{H}$  NMR spectrum of polymer Q1 (400 MHz, r. t., in  $\text{CDCl}_3$ ).

## Polymer Q2

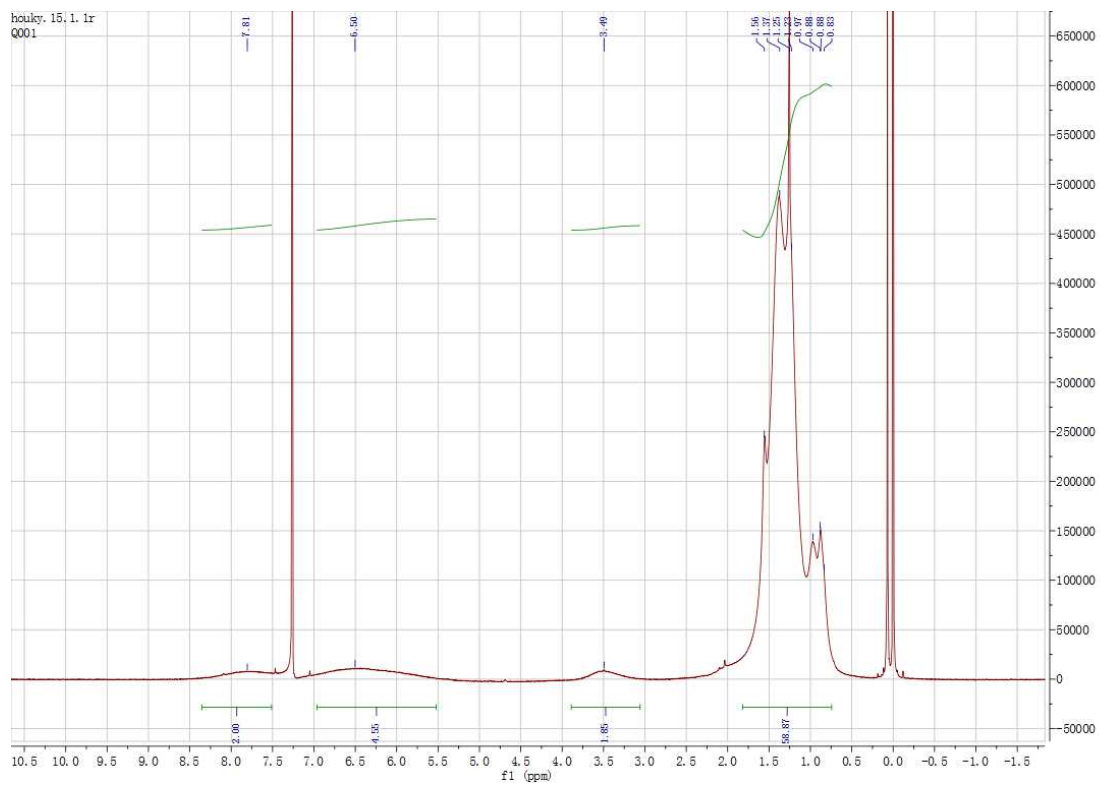

Figure S11.  $^1\text{H}$  NMR spectrum of polymer Q2 (400 MHz, r. t., in  $\text{CDCl}_3$ ).

## Polymer Q3

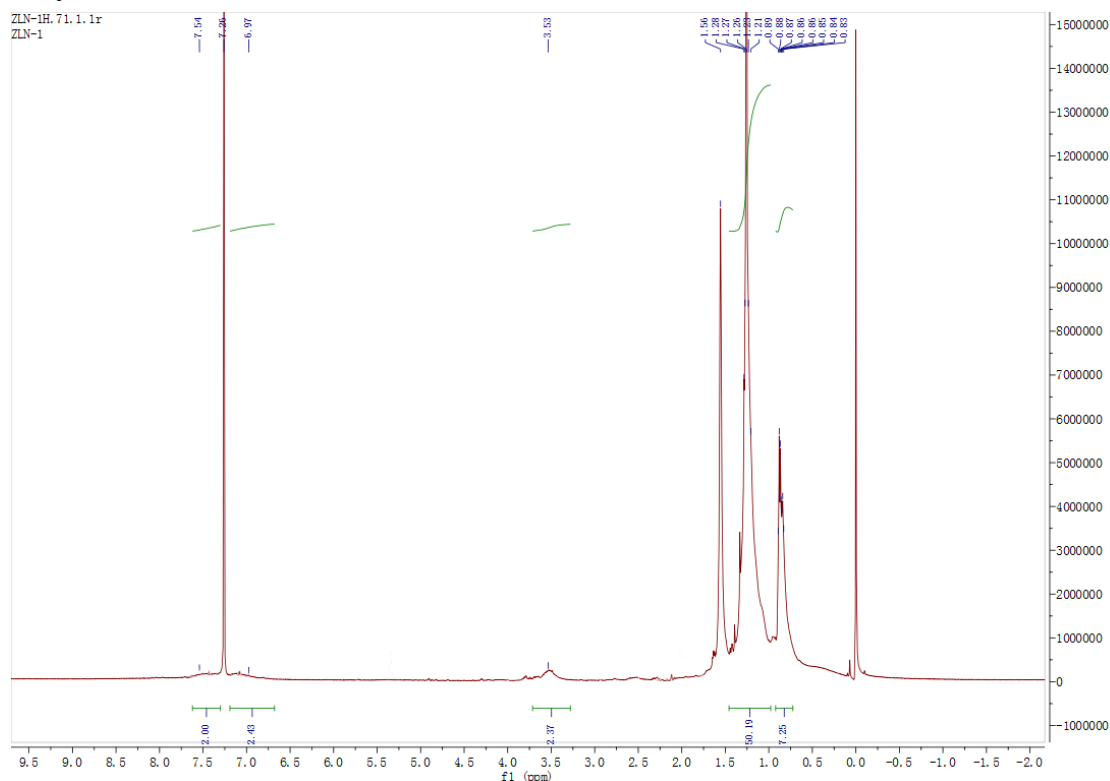

**Figure S12.** <sup>1</sup>H NMR spectrum of polymer **Q3** (400 MHz, r. t., in CDCl<sub>3</sub>).

## 7. Reference

- (1) Nielsen, C. B.; Bjørnholm, T. *Org. Lett.*, 2004, **6**, 3381.
- (2) Guo, X.; Ortiz, R. P.; Zheng, Y.; Kim, M.-G.; Zhang, S.; Hu, Y.; Lu, G.; Facchetti, A.; Marks, T. J. *J. Am. Chem. Soc.*, 2011, **133**, 13685.
- (3) M. J. Frisch, G. W. Trucks, H. B. Schlegel, G. E. Scuseria, M. A. Robb, J. R. Cheeseman, G. Scalmani, V. Barone, B. Mennucci, G. A. Petersson, H. Nakatsuji, M. Caricato, X. Li, H. P. Hratchian, A. F. Izmaylov, J. Bloino, G. Zheng, J. L. Sonnenberg, M. Hada, M. Ehara, K. Toyota, R. Fukuda, J. Hasegawa, M. Ishida, T. Nakajima, Y. Honda, O. Kitao, H. Nakai, T. Vreven, J. A. Montgomery, J. E. Peralta Jr., F. Ogliaro, M. Bearpark, J. J. Heyd, E. Brothers, K. N. Kudin, V. N. Staroverov, R. Kobayashi, J. Normand, K. Raghavachari, A. Rendell, J. C. Burant, S. S. Iyengar, J. Tomasi, M. Cossi, N. Rega, J. M. Millam, M. Klene, J. E. Knox, J. B. Cross, V. Bakken, C. Adamo, J. Jaramillo, R. Gomperts, R. E. Stratmann, O. Yazyev, A. J. Austin, R. Cammi, C. Pomelli, J. W. Ochterski, R. L. Martin, K. Morokuma, V. G. Zakrzewski, G. A. Voth, P. Salvador, J. J. Dannenberg, S. Dapprich, A. D. Daniels, O. Farkas, J. B. Foresman, J. V. Ortiz, J. Cioslowski, and D. J. Fox, *Gaussian, Inc., Wallingford CT*, 2009.
